# Supplementary material for: Multiple amplification detection of microRNA based on the host–guest interaction between β-cyclodextrin polymer and pyrene
Source: Royal Society of Chemistry journal article supplement (doi:10.1039/c5an00626k), 2015-01-01
Supplement: c5an00626k1.pdf [file c5an00626k1.pdf]

## Electronic Supplementary Information

### Multiple amplified detection of microRNA based on host-guest interaction between $\beta$ - cyclodextrin polymer and pyrene

Xiaochen Guo,<sup>a</sup> Xiaohai Yang,<sup>\*a</sup> Pei Liu,<sup>b</sup> Kemin Wang,<sup>\*a</sup> Qing Wang,<sup>a</sup> Qiuping Guo,<sup>a</sup> Jin Huang,<sup>a</sup> Wenshan Li,<sup>a</sup> Fengzhou Xu<sup>a</sup> and Chunxia Song<sup>a</sup>

<sup>a</sup> State Key Laboratory of Chemo/Biosensing and Chemometrics, College of Chemistry and Chemical Engineering, Key Laboratory for Bio-Nanotechnology and Molecular Engineering of Hunan Province, Hunan University, Changsha 410082, China.

<sup>b</sup> Hunan Province Environmental Monitoring Centre, Changsha 410014, China.

\*To whom correspondence should be addressed:

Phone: +86-731-88821566.

Fax: +86-731-88821566.

E-mail: kmwang@hnu.edu.cn, yangxiaohai@hnu.edu.cn.

**Table S1.** All the sequences are listed as below (from 5' to 3')

| Name                                    | Sequence (5'-3')                                                              |
|-----------------------------------------|-------------------------------------------------------------------------------|
| mono-pyrene-labeled<br>molecular beacon | (Phosphorylated)AAGCTGAGGTCTTGGACATCAACATCAGT<br>CTGATAAGCTATGTCCAAGA(Pyrene) |
| primer                                  | TCTTGGAC                                                                      |
| miRNA-21                                | UAGCUUAUCAGACUGAUGUUGA                                                        |
| smRNA                                   | UAGCUUAUCAG <i>UCUGAUGUUGA</i>                                                |
| tmRNA                                   | <i>UCGCUUAUCGGACUGAUCUUGA</i>                                                 |
| Random RNA                              | AAUAUAUCUGCUGAGGAUCAGA                                                        |

Nucleotide mismatches were marked in red and indicated as italic letters.

## Characterization of $\beta$ -CDP

The structure of  $\beta$ -CDP was confirmed by FTIR spectra and  $^1\text{H}$  NMR spectra (Fig. S1). The molecular weight of  $\beta$ -CDP ( $M_n \sim 94,400$ ) was measured by using gel permeation chromatography (GPC, waters-515). As shown in Fig. S1 A, the FTIR spectra showed that most absorption bands of  $\beta$ -CD were still present in spectrum of  $\beta$ -CDP. Due to the cross-linking reaction of  $\beta$ -CD, the absorption bands of stretching vibration of C-O-C at  $1070 \sim 1160 \text{ cm}^{-1}$  were broadened as shown in the spectrum of  $\beta$ -CDP. The  $^1\text{H}$  NMR spectra showed that most bands of  $\beta$ -CD at 4.0-3.4 ppm were broadened in the spectrum of  $\beta$ -CDP (Fig. S1 B).

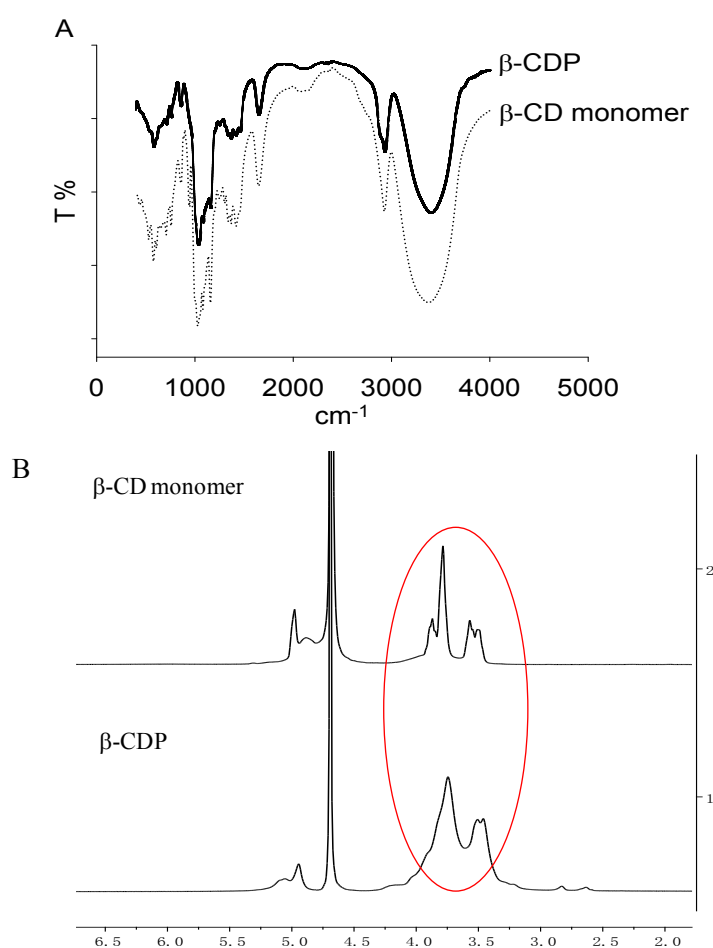

**Fig. S1** (A) FTIR spectra of  $\beta$ -CD monomer and  $\beta$ -CDP. (B)  $^1\text{H}$  NMR spectra of  $\beta$ -CD monomer and  $\beta$ -CDP.

## Optimization of experimental conditions

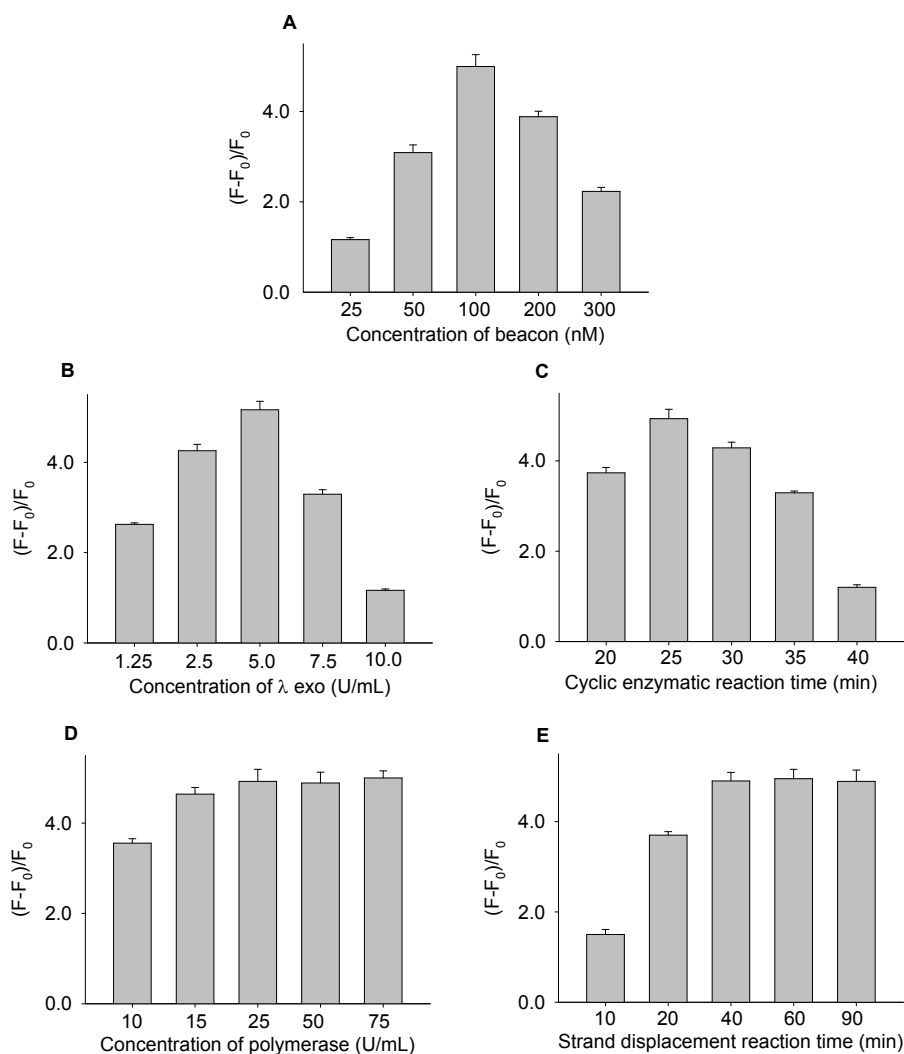

**Fig. S2** The effect of different condition for detection of miRNA-21 based on host-guest interaction between  $\beta$ -CDP and pyrene. (A) Different concentrations of mono-pyrene-labeled molecular beacon, the concentrations of miRNA-21, primer, polymerase,  $\lambda$  exo and  $\beta$ -CDP were 0.5 nM, 200 nM, 25 U mL<sup>-1</sup>, 5 U mL<sup>-1</sup> and 1.5 mg mL<sup>-1</sup>, respectively; (B) Different concentrations of  $\lambda$  exo, the concentrations of miRNA-21, beacon, primer, polymerase and  $\beta$ -CDP were 0.5 nM, 100 nM, 200 nM, 25 U mL<sup>-1</sup> and 1.5 mg mL<sup>-1</sup>, respectively; (C) Different cyclic enzymatic reaction time, the concentrations of miRNA-21, beacon, primer, polymerase,  $\lambda$  exo and  $\beta$ -CDP were 0.5 nM, 100 nM, 200 nM, 25 U mL<sup>-1</sup>, 5 U mL<sup>-1</sup> and 1.5 mg mL<sup>-1</sup>, respectively; the strand displacement reaction time is 40 min; (D) Different concentrations of polymerase, the concentrations of miRNA-21, beacon, primer,  $\lambda$  exo and  $\beta$ -CDP were 0.5 nM, 100 nM, 200 nM, 5 U mL<sup>-1</sup> and 1.5 mg mL<sup>-1</sup>, respectively; (E) Different strand displacement reaction time, the concentrations of miRNA-21, beacon, primer, polymerase,  $\lambda$  exo and  $\beta$ -CDP were 0.5 nM, 100 nM, 200 nM, 25 U mL<sup>-1</sup>, 5 U mL<sup>-1</sup> and 1.5 mg mL<sup>-1</sup>, respectively; the cyclic enzymatic reaction

time is 25 min; The excitation/emission wavelength was set at 345 nm/380 nm. Error bars indicated the standard deviations of three experiments.

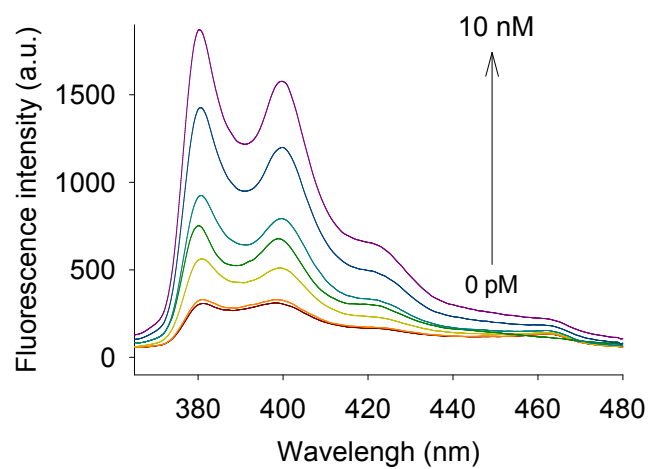

**Fig. S3** Fluorescence spectra of the multiple amplified fluorescent method in serum samples over a range of miRNA-21 concentrations. The concentrations of beacon, primer, polymerase,  $\lambda$  exo and  $\beta$ -CDP were 100 nM, 200 nM, 25 U mL<sup>-1</sup>, 5 U mL<sup>-1</sup> and 1.5 mg mL<sup>-1</sup>, respectively. Error bars indicated the standard deviations of three experiments.

**Table S2.** Comparison of the proposed method with other amplification strategies.

| Style                                           | Detection limit | Response time | References |
|-------------------------------------------------|-----------------|---------------|------------|
| Catalytic Recycling                             | 0.4 fM          | 4 h           | S1         |
| Magnetic beads-assisted assay                   | 0.1 pM          | 4 h           | S2         |
| DNase I-assisted target recycling               | 2.3 pM          | 90 min        | S3         |
| Graphene oxide-assisted enzymatic amplification | 9 pM            | 4 h           | S4         |
| Gold nanoparticle                               | 5-8 pM          | 5 h           | S5         |
| WS <sub>2</sub> nanosheet mediated assay        | 0.3 pM          | 40 min        | S6         |
| Copper nanoparticles strategy                   | 10 pM           | 16 h          | S7         |
| This method                                     | 0.3 pM          | 65 min        |            |

## References

- S1 P. Miao, B. Wang, X. Chen, X. Li and Y. Tang, *Appl. Mater. Interfaces.*, 2015, **7**, 6238.
- S2 W. Shen, K. H. Yeo and Z. Gao, *Analyst*, 2015, **140**, 1932.
- S3 Y. Xie, X. Lin, Y. Huang, R. Pan, Z. Zhu, L. Zhou and C. J. Yang, *Chem. Commun.*, 2015, **51**, 2156.
- S4 L. Cui, X. Lin, N. Lin, Y. Song, Z. Zhu, X. Chen and C. J. Yang, *Chem. Commun.*, 2012, **48**, 194.
- S5 F. Degliangeli, P. Kshirsagar, V. Brunetti, P. P. Pompa and R. Fiammengo, *J. Am. Chem. Soc.*, 2014, **136**, 2264.
- S6 Q. Xi, D. Zhou, Y. Kan, J. Ge, Z. Wu, R. Yu and J. Jiang, *Anal. Chem.*, 2014, **86**, 1361.
- S7 F. Xu, H. Shi, X. He, K. Wang, D. He, Q. Guo, Z. Qing, L. Yan, X. Ye, D. Li and J. Tang, *Anal. Chem.*, 2014, **86**, 6976.
